# Supplementary material for: An obligatory role for club cells in preventing obliterative bronchiolitis in lung transplants
Source: JCI journal article supplement (doi:10.1172/jci.insight.124732), 2019-04-16
Supplement: sd1 [file 1]

# Supplemental Figure 1

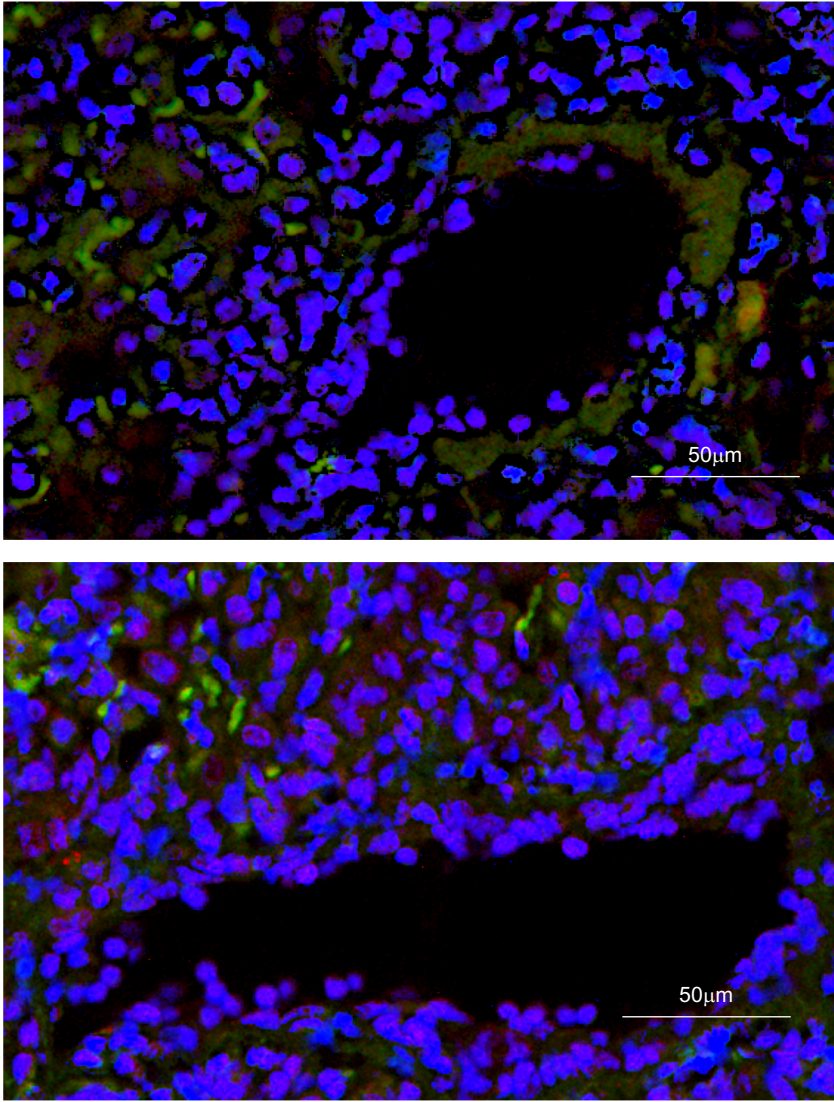

**CCSP** **Ac-tubulin**

**Sup. Figure 1:** POD 16 3T FVB → B6 recipient allograft tissue were stained with CCSP and acetylated  $\alpha$ -tubulin (Ac-tubulin) antibodies . Upper and lower panels represent typical bronchioles with low to undetectable luminal Ac-tubulin expression, respectively . Data are representative of three transplants.

# Supplemental Figure 2

3T B6 → B6 + DOX, POD 30

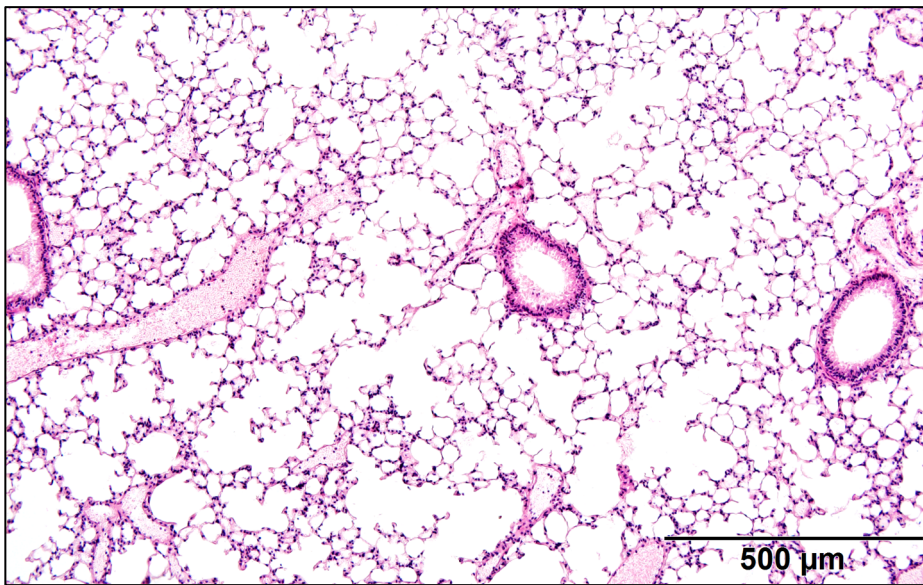

**Sup. Figure 2:** H&E histology of POD 30 graft tissue from 3T B6 → B6 recipient that received DOX between POD 7 and 9.5. Data are representative of 3 transplants.

# Supplemental Figure 3

A.

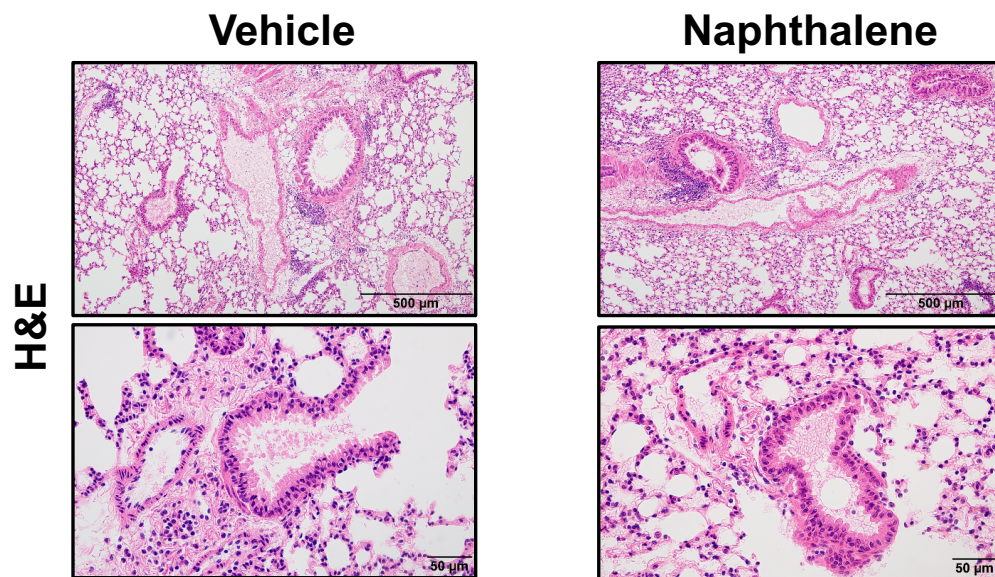

B.

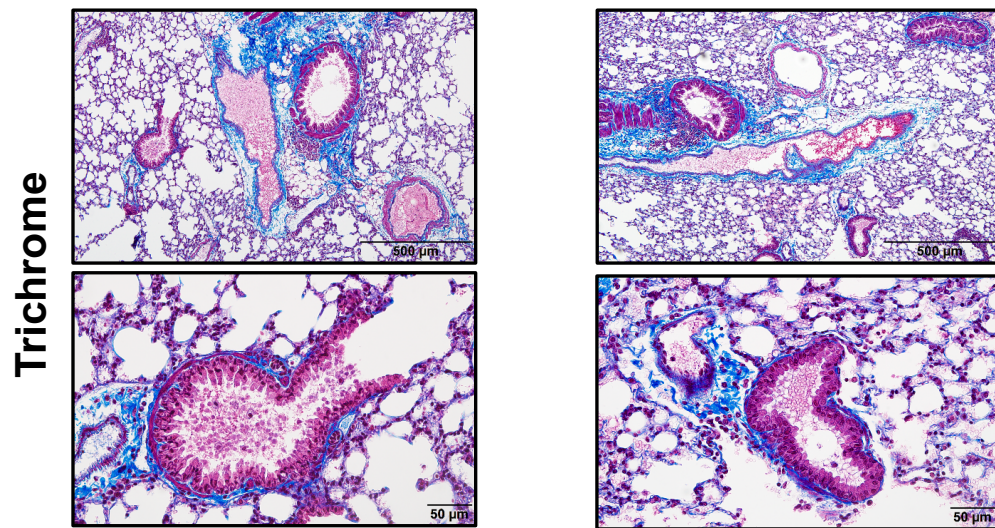

C.

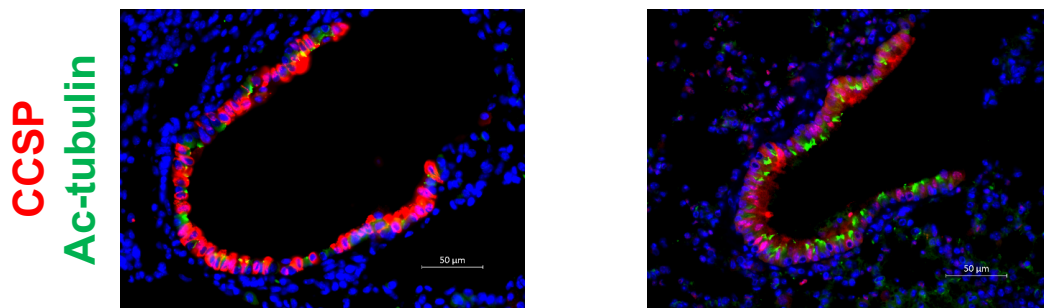

**Sup. Figure 4:** POD 16 (A) H&E histology, (B) trichrome and (C) immunohistochemical stain of allograft tissue from FVB → B6 recipient with that received either vehicle or naphthalene on POD 7. Data shown is from a representative transplant of 3 recipients per group.

# Supplemental Figure 4

2T FVB → B6 + DOX, POD 16

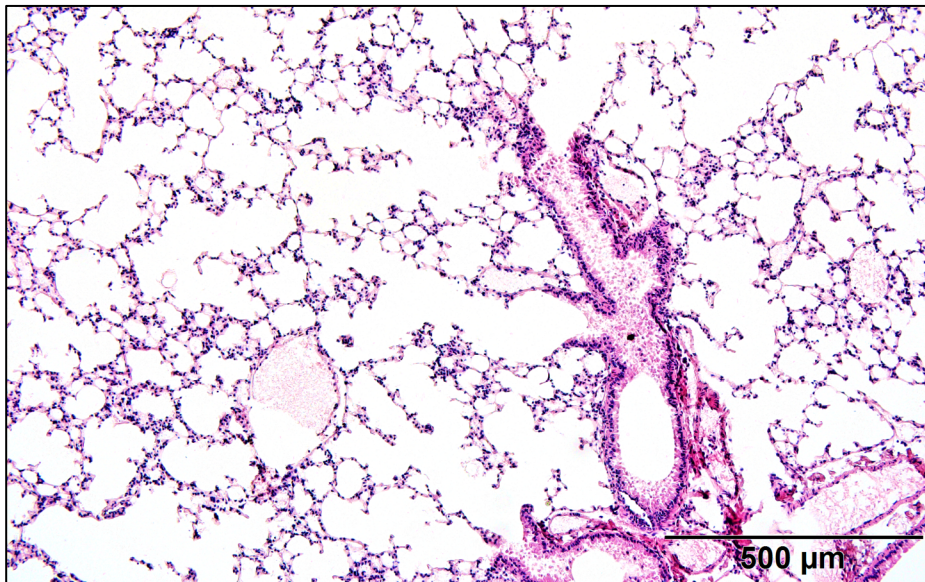

**Sup. Figure 4:** H&E histology of POD 16 graft tissue from 2T FVB → B6 recipient that received DOX between POD 7 and 9.5. Data are representative of 2 transplants.

# Supplemental Figure 5

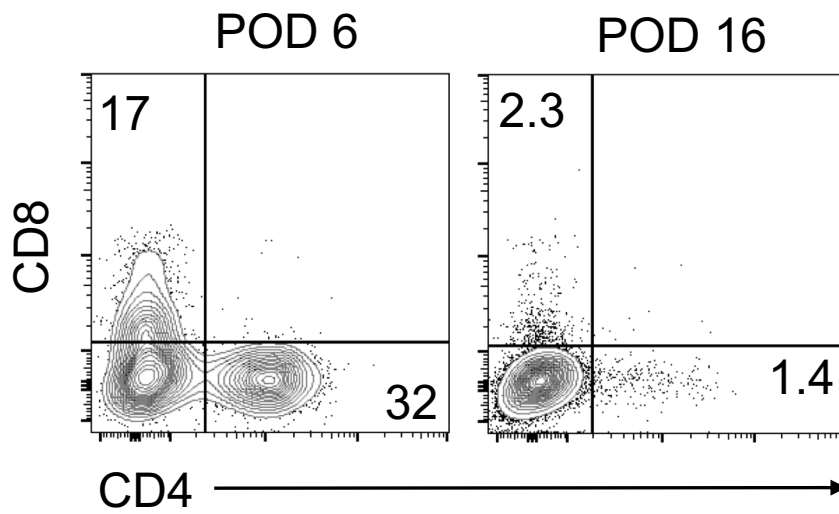

**Sup. Figure 5:** FACS analysis of intragraft CD4<sup>+</sup> and CD8<sup>+</sup> T cells in 3T FVB > B6 recipients just prior to (POD 6) and after (POD 16) administration CD4 and CD8 depleting Abs on POD 6 and 11. Data are representative of 3 transplants.

# Supplemental Figure 6

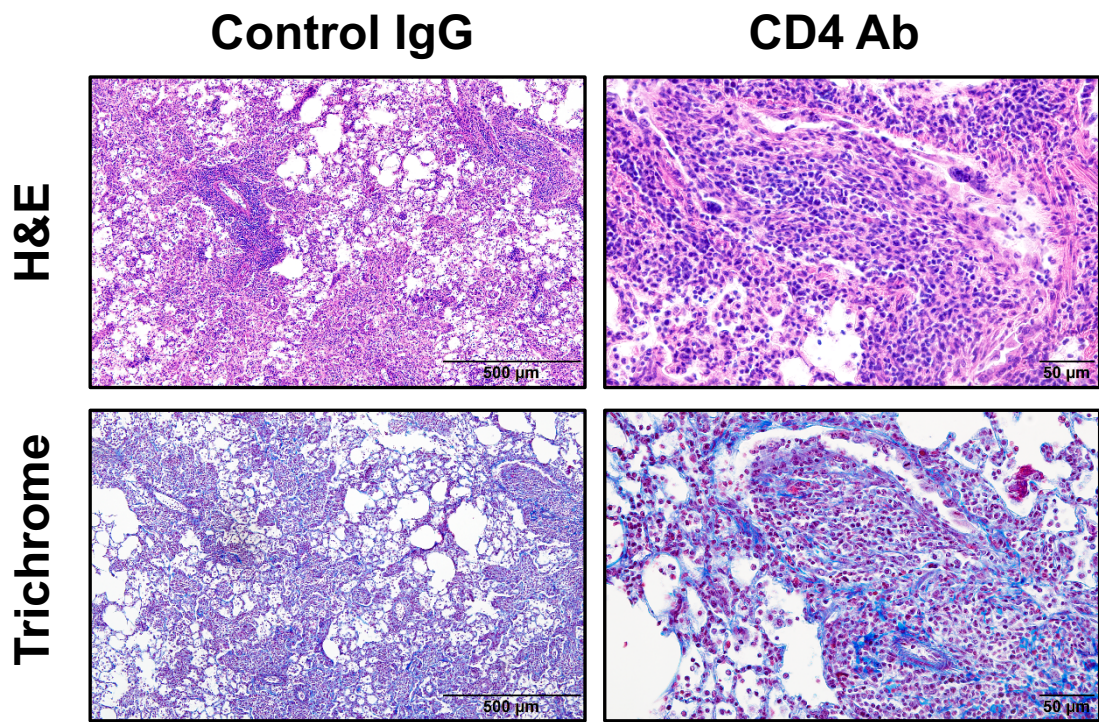

**Sup. Figure 6:** 3T FVB → B6 recipients received Control IgG or CD4 depleting Abs on POD 6 and 11. On POD 16 allograft tissue was assessed for inflammation by H&E and trichrome stain. Data are from a representative transplant from 3 recipients per group.
